# Supplementary material
Source: PubMed Central journal article supplement (PMC4325374)
Supplement: supp_142.4.644_DEV113357supp.pdf [file supp_142.4.644_DEV113357supp.pdf]

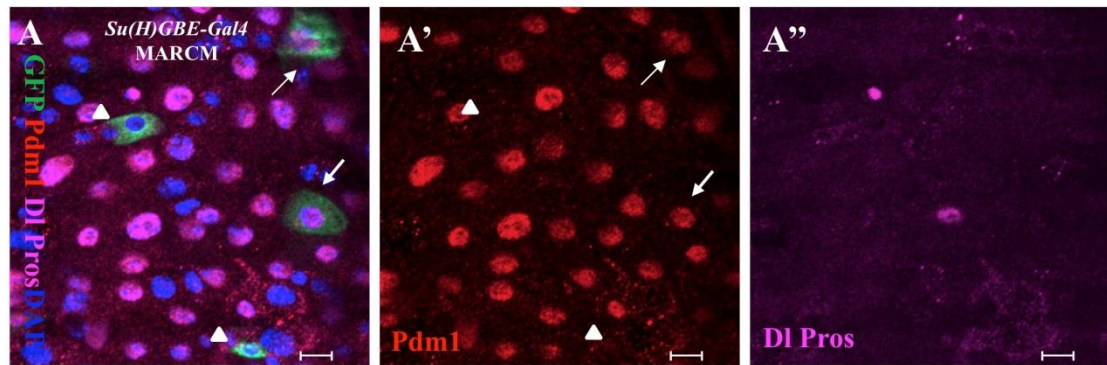

**Fig. S1. ECs, but not EEs, develop from Su(H)GBE<sup>+</sup> EBs**

(A-A'') MARCM clones using *Su(H)GBE-Gal4* instead of *Tub-Gal4*. Some Pdm1<sup>+</sup> ECs (arrow) inherited weak GFP from Su(H)GBE<sup>+</sup> EBs (arrowhead), but none of the EEs inherited GFP from Su(H)GBE<sup>+</sup> EBs. The genotype is *hs-flp, tub-Gal80, FRT19A/FRT19A, sn3, w1118; Su(H)GBE-Gal4, UAS-mCD8-GFP*.

The adult fly posterior midguts were stained with anti-GFP (green), anti-Pdm1 (red), anti-Dl (cytoplasmic, purple), anti-Pros (nuclear, purple), and DAPI (blue). Scale bars, 10  $\mu$ m.

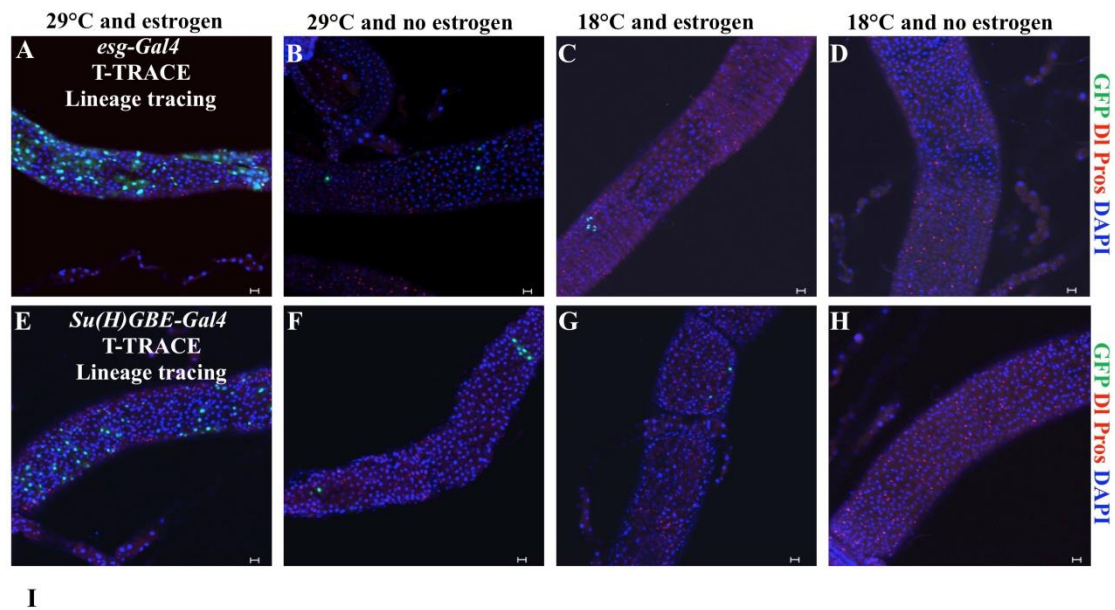

I

Percentage of guts that have at least one GFP-positive cell

| Genotype/Culture condition    | 29°C and estrogen | 29°C and no estrogen | 18°C and estrogen | 18°C and no estrogen |
|-------------------------------|-------------------|----------------------|-------------------|----------------------|
| <i>esg-Gal4</i> /T-TRACE      | 100% (n=29)       | 35.4% (n=48)         | 17.3% (n=52)      | 1.8% (n=57)          |
| <i>Su(H)GBE-Gal4</i> /T-TRACE | 100% (n=38)       | 39.0% (n=41)         | 18.8% (n=32)      | 0% (n=45)            |

**Fig. S2. The T-TRACE analysis system.**

(A-D) Fluorescence images showing T-TRACE analysis of the *esg-Gal4* line at 29°C on food with estrogen (A), at 29°C on food without estrogen (B), at 18°C on food with estrogen (C), and at 18°C on food without estrogen (D).

(E-H) Fluorescence images showing T-TRACE analysis of the *Su(H)GBE-Gal4* line at 29°C on food with estrogen (E), at 29°C on food without estrogen (F), at 18°C on food with estrogen (G), and at 18°C on food without estrogen (H). The adult fly posterior midguts were stained with anti-GFP (green), anti-D1 (cytoplasmic, red), anti-Pros (nuclear, red), and DAPI (blue). Scale bars, 20 μm.

(I) The quantitative percentage of guts containing at least one GFP-positive cell in each of the above conditions.

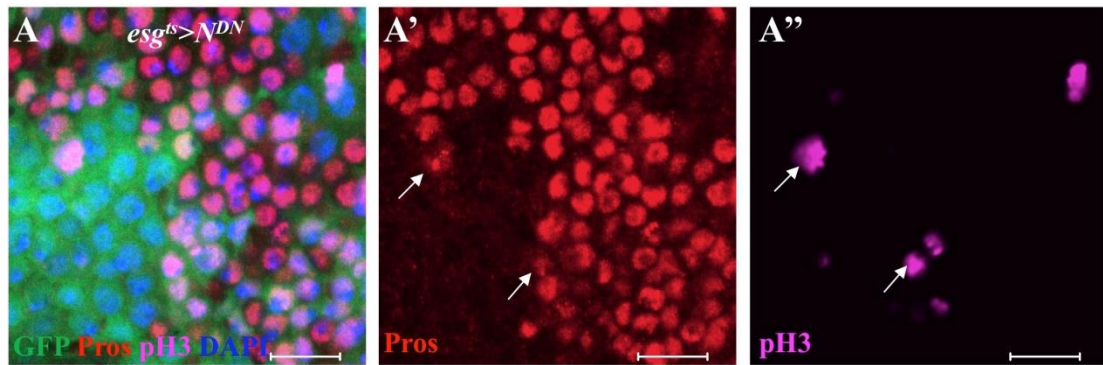

**Fig. S3. Some of the dividing ISC-like cells express Pros.**

(A-A'') Pros<sup>+</sup> cells in the *N<sup>DN</sup>* midgut are undergoing cell division in the *N<sup>DN</sup>* midgut (arrow).

The adult fly posterior midguts were stained anti-GFP (green), anti-Pros (red), anti-pH3 (purple), and DAPI (blue). Scale bars, 10 μm.

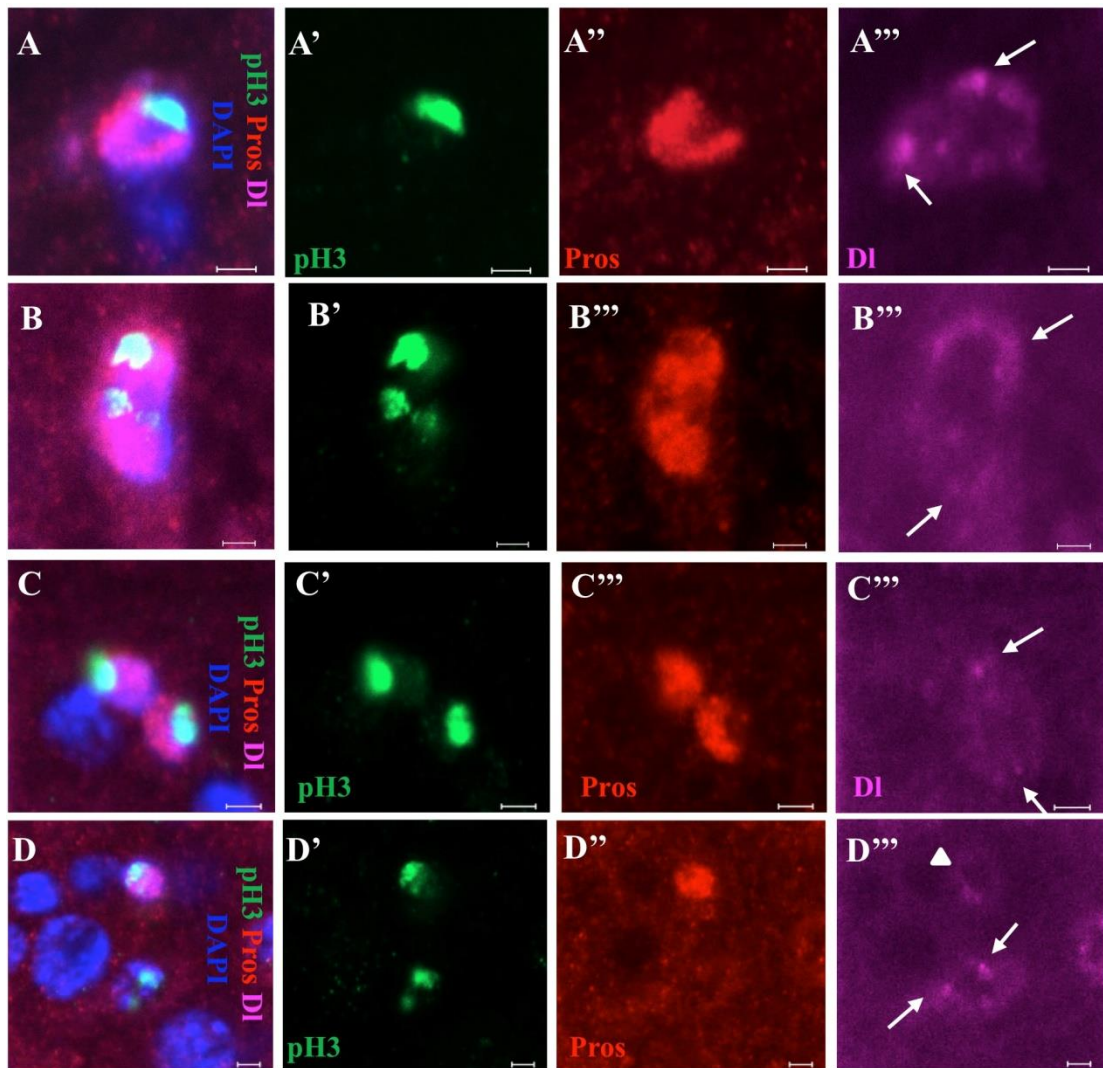

**Fig. S4. EEs are generated from ISCs through pre-EEs.**

(A-A''') A dividing  $DI^+$  ISC at pre-prophase expresses EE marker Pros.

(B-B''') A dividing ISC at early telophase generates two  $DI^+$   $Pros^+$  pre-EEs by symmetric division.

(C-C''') A dividing ISC at late telophase generates two  $DI^+$   $Pros^+$  pre-EEs by symmetric division.

(D-D''') A dividing ISC at late telophase generates one  $DI^+$   $Pros^+$  pre-EE and one  $DI^+$   $Pros^-$  ISC by asymmetric division.

The adult fly posterior midguts were stained with anti-pH3 (green), anti-Pros (red), anti-DI (purple), and DAPI (blue). Scale bars, 2  $\mu m$ .

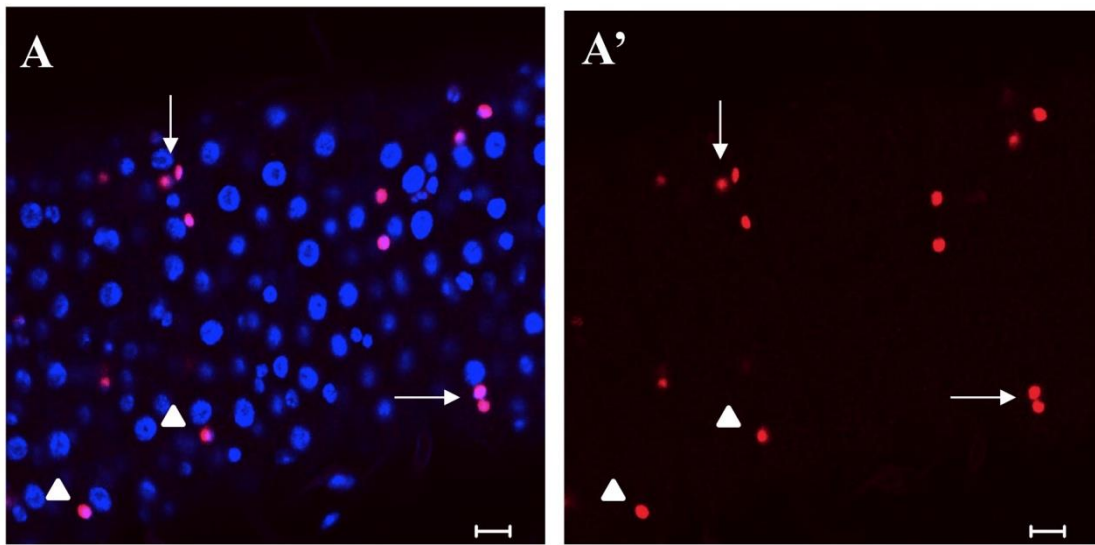

**Fig. S5. Single EEs and pairs of EEs in the posterior midgut.**

(A-A'') A representative image showing single (arrowhead) EEs and pairs (arrow) of EE cells. The ratio of EE cell pairs to single cells is 1:4.5.

The adult fly posterior midguts were stained with anti-Pros (red) and DAPI (blue).

Scale bars, 10 μm.

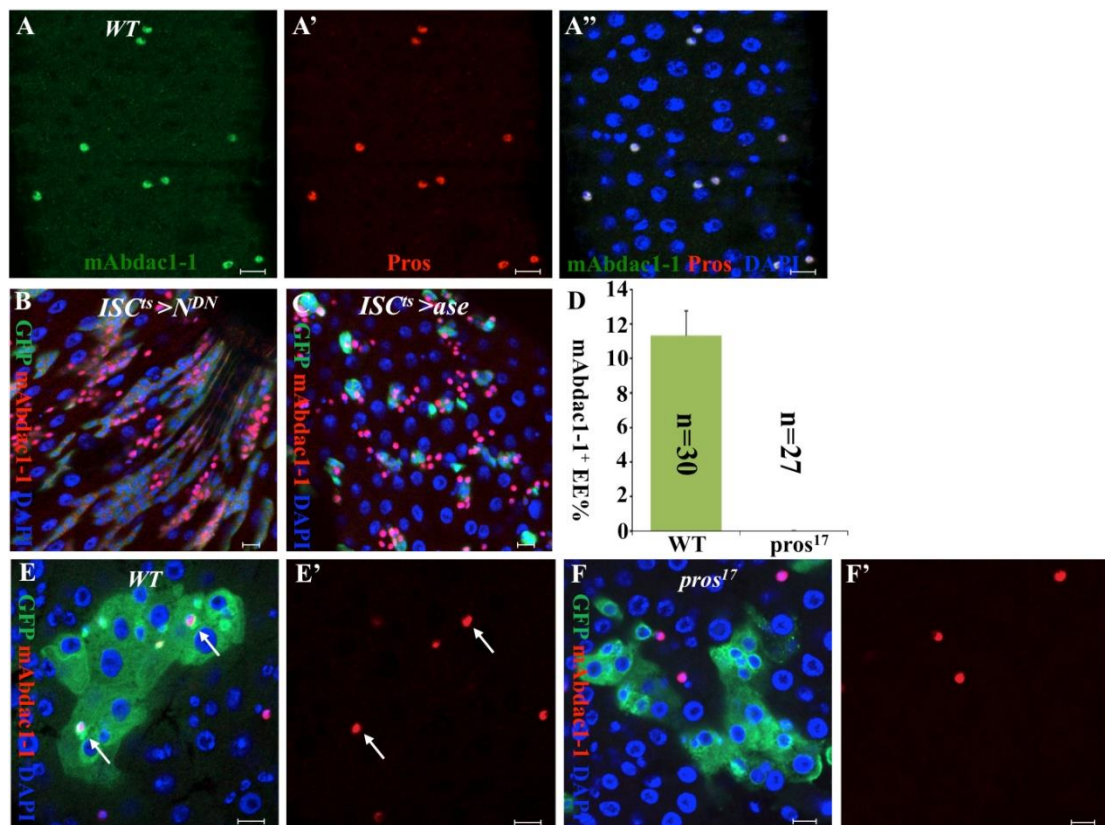

**Fig. S6. The identification of transcriptional regulator Dachshund (Dac) as a new EE marker.**

(A-A'') The anti-Dac antibody Mabdac1-1 specifically labeled Pros<sup>+</sup> EEs (Dach, Green; Pros, Red).

(B-C) Excessive EEs caused by the overexpression of UAS-NDN (B) or UAS-Asense (C) were labeled by the anti-Dac antibody.

(D) The quantitative percentages of Dac<sup>+</sup> EEs in GFP<sup>+</sup> clones in E-F'.

(E-F'') MARCM clones of wild-type control (E, E') and *pros*<sup>17</sup> (F, F'). Seven days after clone induction, GFP-marked clones of *pros*<sup>17</sup> were devoid of Dac<sup>+</sup> EEs (F, F'), compared to their wild-type counterparts (E, E'). Scale bars, 10  $\mu$ m.

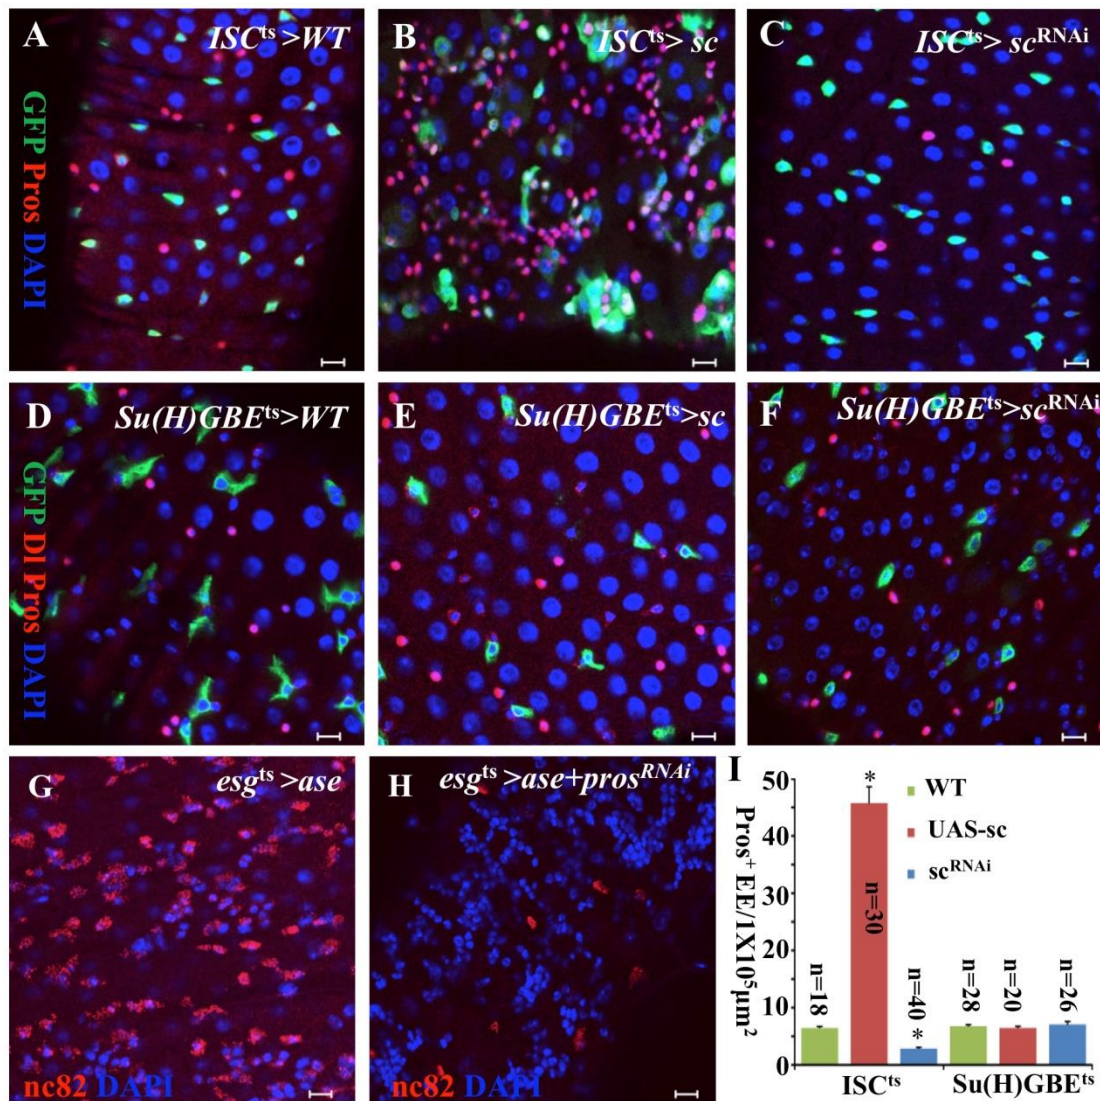

**Fig. S7. Sc regulates EE cell fate determination in ISCs.**

(A-F) The overexpression ( $ISC^{ts} > sc$ ; B) or knockdown ( $ISC^{ts} > sc^{RNAi}$ ; C) of *sc* in ISCs, but not in  $Su(H)GBE^{ts}$  EBs ( $Su(H)GBE^{ts} > sc$ ; E; or  $Su(H)GBE^{ts} > sc^{RNAi}$ ; F), resulted in significant changes in the percentage of  $Pros^+$  EE cells, compared to their wild-type counterparts (compare B and C to A; compare E and F to D).

(G) The overexpression of *ase* in ISCs and EBs ( $esg^{ts} > ase$ ).

(H) The overexpression of *ase* and  $pros^{RNAi}$  in ISCs and EBs ( $esg^{ts} > ase + pros^{RNAi}$ ). The overexpression of  $pros^{RNAi}$  suppressed the excess EE phenotype associated with *ase* overexpression, indicating that Pros functions either downstream of or parallel to Ase.

In A-F, the adult fly posterior midguts were stained with anti-GFP (green), anti-Dl (cytoplasmic, red), anti-Pros (nuclear, red), and DAPI (blue). In G-H, the adult fly posterior midguts were stained with nc82 (red) and DAPI (blue). Scale bars, 10  $\mu\text{m}$ .

(I) The quantification of Pros<sup>+</sup> cells in equal areas in A–F. Data are represented as mean  $\pm$  s.e.m. \* $P < 0.01$ .



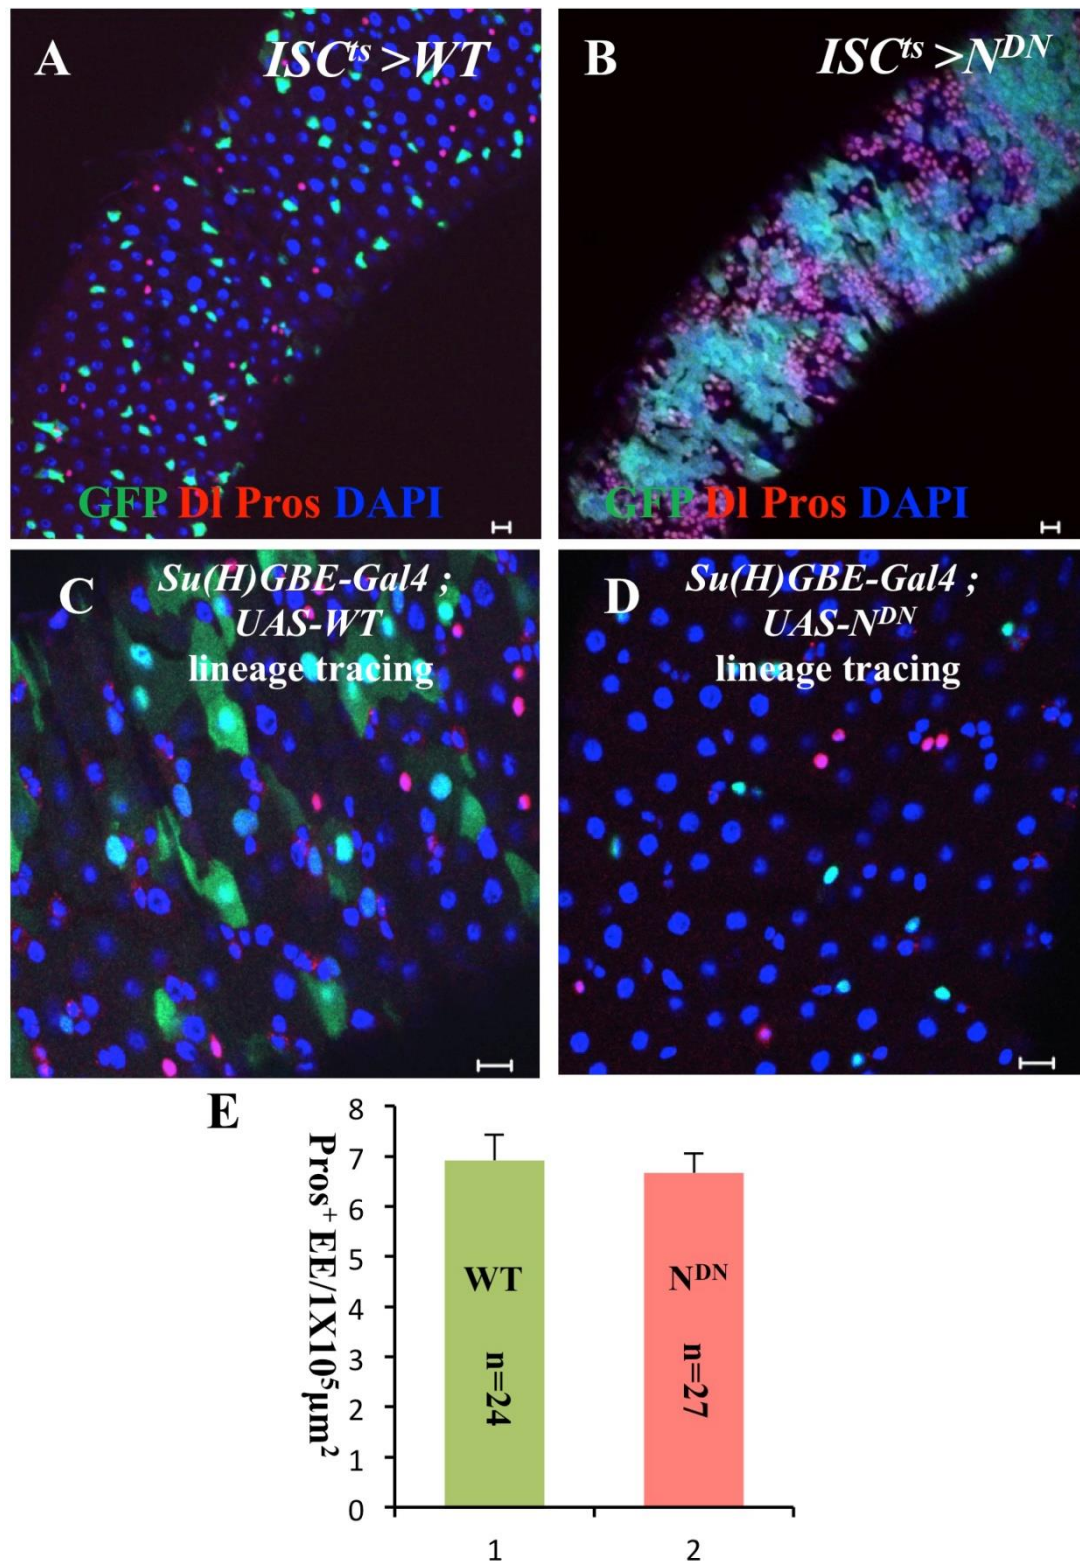

**Fig. S8. The function of the N signal in ISCs and Su(H)GBE<sup>+</sup> EBs.**

(A-B) The expression of *N<sup>DN</sup>* in ISCs (*ISC<sup>ts</sup> > N<sup>DN</sup>*; B) resulted in the expansion of both ISC- and EE-like cells, compared to their wild-type counterparts (A).

(C-D) The expression of  $N^{DN}$  in Su(H)GBE<sup>+</sup> EBs using the T-TRACE system (Su-Gal4/T-TRACE >  $N^{DN}$ ; D) completely blocked differentiation of EBs into ECs, compared to wild-type counterparts (C).

In A-D, the adult fly posterior midguts were stained with anti-GFP (green), anti-Dl (cytoplasmic, red), anti-Pros (nuclear, red), and DAPI (blue). Scale bars, 10  $\mu$ m.

(E) The quantification of Pros<sup>+</sup> cells in equal areas in C and D. Data are represented as mean  $\pm$  s.e.m.
